# Supplementary material for: Serine/Threonine Protein Phosphatases 1 and 2A in Lung Endothelial Barrier Regulation
Source: MDPI journal article supplement (doi:10.3390/biomedicines11061638), 2023-06-05
Supplement: s1 [file s1]

**Table S1.** Shown are specific primers of PP2A 'B' isoforms expression profile in HLMVECs obtained by PCR

| Gene    | Gene Accession<br># <i>Homo sapiens</i> | Name                   | Forward Primer / Reverse primer                 | Product size<br>(bp) |
|---------|-----------------------------------------|------------------------|-------------------------------------------------|----------------------|
| PPP1R1A | <a href="#">NM_014225.5</a>             | PP2A A $\alpha$        | TCATGGGTCTCTCTCCCATC<br>TAGTCATGCGGTGCAGGTAG    | 456                  |
| PPP2R1B | <a href="#">NM_002716.4</a>             | PP2A A $\beta$         | CAGAAAGCCATGGGTCCTAA<br>CAGCAGCGGCATATACTCAA    | 480                  |
| PPP2R2A | <a href="#">NM_002717.3</a>             | PP2A B $\alpha$        | GTTTGACAGTGTGCCATTCG<br>CCACTGACCCCAAAGTACTGACT | 484                  |
| PPP2R2B | <a href="#">NM_004576.2</a>             | PP2A B $\beta$         | GGAAGTGGAGCTGGAGTGAG<br>GGTTCATGGCTCTGGAATGT    | 489                  |
| PPP2R2C | <a href="#">NM_020416.3</a>             | PP2A B $\gamma$        | CAGCCCTAGAGGCAGTTGAC<br>GCGTCTCAGTTCTCCTGGAC    | 470                  |
| PPP2R2D | <a href="#">NM_018461.3</a>             | PP2A B $\delta$        | CGGAGGAAAGACGAGATCAG<br>AGGAAGGCTCGGACTGAAAT    | 431                  |
| PPP2R3A | <a href="#">NM_002718.4</a>             | PP2A B' $\alpha$       | AGCAGAGGGAGCCTATCACA<br>GGGGCTTTCCAATAGAGAGG    | 464                  |
| PPP2R3C | <a href="#">NM_017917.2</a>             | PP2A B' $\gamma$       | GCAAGCAATTTTTTCACAGCA<br>TTAGGGCAGAAGGAGCAGAA   | 429                  |
| PPP2R4  | <a href="#">NM_021131.4</a>             | PP2A B'<br>(activator) | CGCCAGATTCTTCAGAGGAG<br>ACTGTGGCCACCAAGTTTTC    | 448                  |
| PPP2R5A | <a href="#">NM_006243.3</a>             | PP2A B' $\alpha$       | CATTGCCACTGAAAGCAGAA<br>TGGCAAACATAATTGGCAGA    | 411                  |
| PPP2R5B | <a href="#">NM_006244.3</a>             | PP2A B' $\beta$        | GAGCGGGCTCTGTATTTCTG<br>GTCCTCAGAAGCCACTCTGG    | 494                  |
| PPP2R5C | <a href="#">NM_002719.3</a>             | PP2A B' $\gamma$       | AGTTGGCCAAATGTGTCTCC<br>GAGCCTCGTCCTTCACTGTC    | 450                  |
| PPP2R5D | <a href="#">NM_006245.3</a>             | PP2A B' $\delta$       | GCTCCCTACTGGCTGTCTTG<br>CAGGCATGGGGTAAGAAGAA    | 492                  |
| PPP2R5E | <a href="#">NM_006246.3</a>             | PP2A B' $\epsilon$     | AGAGGTGCGAAAGTTCCTCA<br>TCTTGGCTTTCCAAAAATCG    | 415                  |

PP2A: Protein Phosphatase 2A; HLMVECs: Human Lung Microvascular Endothelial Cells; PCR: Polymerase Chain Reaction; bp: base pair.
